# Supplementary material for: Harnessing Native Swine Probiotics: Unveiling Their Protective Shield Against Salmonella Typhimurium – Insights from an Immune and Gut Microbiome Perspective
Source: Research Square preprint supplement (doi:10.21203/rs.3.rs-6367837/v1), 2025-06-18
Supplement: Supplementary file 1 [file 656618bd74ff80470be0dd46.docx]

**Supplementary Information**

**Table S1** Overview of probiotic functions and safety of bacteria and yeast used for protective efficacy evaluation

| Aspect | *L. plantarum*  TBRC-15420 | *B. amyloliquefaciens* TBRC-15434 | *S. cerevisiae*  TBRC-19857 |
| --- | --- | --- | --- |
| Acid tolerance (pH3) | High (100.00%) | High (115.05%) | High (127.38%) |
| Bile tolerance | High (100.00%) | High (75.16%) | High (139.94%) |
| Auto-aggregation | High (69.74%) | High (65.99%) | High (90.09%) |
| Hydrophobicity | Strong (70.14%) | Moderate (34.13%) | High (59.21%) |
| Biofilm formation | Biofilm producer | Biofilm producer | ND |
| Adhesion to Caco-2 | Low (9.31%) | Low (2.0%) | Intermediate (43.18%) |
| Antibacterial activity* | Yes | Yes | No activity |
| Co-aggregation | EHEC (74.09%)  EPEC (60.83%)  ST (64.37%) | EHEC (40.96%) EPEC (34.52%) ST(34.76%) | EHEC (55.37%) EPEC (57.91%)  ST(56.62%) |
| Hemolytic activity | γ-hemolytic | γ-hemolytic | γ-hemolytic |
| Antibiotic test | Sensitive** | Sensitive*** | ND |
| Enzyme production | ND | cellulase, xylanase, pectinase | xylanase, phytase |
| Signs of toxicity | No signs | No signs | No signs |
| Histopathological  analysis | No tissue damages  or abnormalities | No tissue damages  or abnormalities | No tissue damages  or abnormalities |
| Effect on gut microbiome | increase beneficial bacteria | enhanced beneficial bacteria and reduced harmful bacteria | enhanced beneficial bacteria and reduced harmful bacteria |

ND = Not determined; * Inhibit EHEC, EPEC, and *S.* Typhimurium (ST); **Susceptible to ampicillin, chloramphenicol, gentamicin, and streptomycin; ***Susceptible to norfloxacin, ciprofloxacin, gentamicin, erythromycin, tetracycline, chloramphenicol, cephalothin, ampicillin, streptomycin, and vancomycin

**
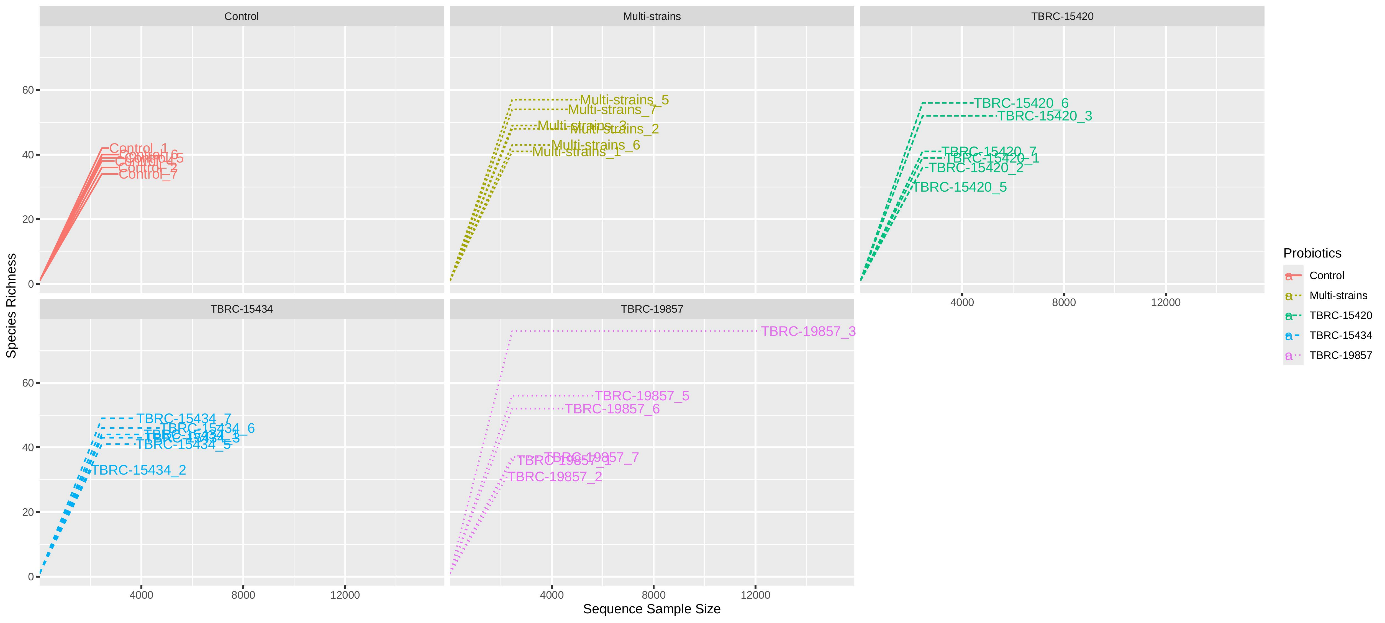
**

**Fig. S1** Rarefaction curve of gut microbiome species richness in probiotic and control mice
